# 1 Genome-wide generalized additive models

2 Georg Stricker<sup>1,2,5</sup>, Alexander Engelhardt<sup>1,5</sup>, Daniel Schulz<sup>1</sup>, Matthias Schmid<sup>3</sup>, Achim Tresch<sup>4</sup>,  
3 and Julien Gagneur<sup>1,2,\*</sup>

4 <sup>1</sup>Gene Center Munich and Department of Biochemistry, Ludwig-Maximilians-Universität  
5 München, Feodor-Lynen-Straße 25, 81377 Munich, Germany.

6 <sup>2</sup>Technische Universität München, Department of Informatics, Boltzmannstr. 3, 85748 Garching,  
7 Germany.

8 <sup>3</sup>Institut für Medizinische Biometrie, Informatik und Epidemiologie, University Hospital Bonn,  
9 Sigmund-Freud-Straße 25, 53105 Bonn, Germany.

10 <sup>4</sup>Institute for Genetics, University of Cologne, Zùlpicher Str. 47b, 50674 Cologne, Germany.

11 <sup>5</sup>These authors contributed equally to this work.

12 \*Correspondence should be addressed to: J.G. ([gagneur@in.tum.de](mailto:gagneur@in.tum.de))

## 13 ABSTRACT

14 **Chromatin immunoprecipitation followed by deep sequencing (ChIP-Seq) is a widely used**  
15 **approach to study protein-DNA interactions. To analyze ChIP-Seq data, practitioners are**  
16 **required to combine tools based on different statistical assumptions and dedicated to spe-**  
17 **cific applications such as calling protein occupancy peaks or testing for differential occu-**  
18 **pancies. Here, we present GenoGAM (Genome-wide Generalized Additive Model), which**  
19 **brings the well-established and flexible generalized additive models framework to genomic**  
20 **applications using a data parallelism strategy. We model ChIP-Seq read count frequencies**  
21 **as products of smooth functions along chromosomes. Smoothing parameters are estimated**  
22 **from the data eliminating ad-hoc binning and windowing needed by current approaches.**  
23 **We derived a peak caller based on GenoGAM with performance matching state-of-the-art**  
24 **methods. Moreover, GenoGAM provides significance testing for differential occupancy with**

25 **controlled type I error rate and increased sensitivity over existing methods. By analyzing a**  
26 **set of DNA methylation data, we further demonstrate the potential of GenoGAM as a generic**  
27 **analysis tool for genome-wide assays.**

## 28 INTRODUCTION

29 Chromatin immunoprecipitation followed by deep sequencing (ChIP-Seq) is the reference method  
30 used for genome-wide quantification of protein-DNA interactions<sup>1</sup>. It is used to study a wide  
31 range of fundamental genome biology processes covering transcription, replication, and mainte-  
32 nance. ChIP-Seq consists of cross-linking DNA with chromatin, followed by DNA fragmentation  
33 and immunoprecipitation of the protein of interest along with its bound DNA fragments. The DNA  
34 fragments are then released, amplified, and sequenced. ChIP-Seq has been applied for studying  
35 DNA-bound proteins of various functions and therefore with various patterns of distribution along  
36 the genome. These include transcription factors that are bound at discrete binding sites<sup>2,3</sup>, histone  
37 modifications<sup>3,4</sup> which are found at nucleosomes, or the transcription<sup>3</sup> and replication machinery  
38 which are even more broadly distributed. Often, the quantities of interest are the occupancies  
39 relative to technical controls, such as the input (a sample that was not subject to the immunopre-  
40 cipitation step), between genetic backgrounds, treatments, or combinations thereof.

41 Although ChIP-Seq is a very generic methodology to study protein-DNA interactions, statis-  
42 tical analysis methods have been so far dedicated to specific applications. Early work has focused  
43 on transcription factors with discrete binding sites, typically DNA motifs at promoters or tran-  
44 scriptional enhancers<sup>2,5</sup>. ChIP-Seq read coverage then shows peaks localized at the binding sites.  
45 The aim of these statistical methods is to identify these peaks and their statistical significance,  
46 typically by controlling the false discovery rate. For example, MACS<sup>5</sup> is a widely used<sup>6,7</sup> peak  
47 caller that assumes a Poisson distribution for the count data and computes peak significance based  
48 on a combination of global and local rate. ZINBA<sup>8</sup> combines a negative binomial mixture model  
49 for background and enriched regions with a zero inflated component for regions with excessive  
50 zero counts. The specific calling of narrow and wide peaks was made possible by JAMM<sup>9</sup>, which

51 makes use of replicates, and is based on a mixture model of enriched and non-enriched regions.

52 Testing for differential overall occupancies at regions of interest across conditions is done  
53 by testing for differences in number of reads overlapping the region <sup>10</sup>. Complementary to testing  
54 for overall occupancies, MMdiff<sup>11</sup> allows testing for differences in shapes in given regions. Lun  
55 et al.<sup>12</sup> provide a framework to test differential occupancies between conditions across windows in  
56 given regions while properly controlling for false discovery rate. This approach allows both testing  
57 for differences in overall occupancies and in shapes.

58 Hence, practitioners rely on different statistical frameworks for peak calling tasks and dif-  
59 ferential occupancies. However, flexible handling of replicates and additional control factors is  
60 not always possible. Moreover, current methods rely on binning and sliding window techniques,  
61 whose choice of the window size is not data-driven but subjective. Another limitation is that the  
62 more general task of statistical inference of a genome-wide bias-corrected occupancy track is not  
63 addressed.

64 Here, we introduce GenoGAM (Genome-wide Generalized Additive Model), which pro-  
65 vides a statistical framework to simultaneously address the above issues. Our model describes  
66 genome-wide occupancy by smooth functions, which facilitate downstream applications such as  
67 peak calling or differential binding analysis. GenoGAM normalizes for sequencing depth and can  
68 handle factorial experimental designs, including biological replicates and multiple controls. The  
69 amount of smoothing is estimated in an automatic, data-driven manner and thus avoids introducing  
70 subjectivity from the analyst. When analyzing differential binding in a factorial design, we ob-  
71 tain well-calibrated per-base-pair p-values. Application to datasets of human and yeast shows that  
72 GenoGAM is as performant as dedicated methods for peak calling and much more sensitive than  
73 state-of-the art differential occupancy methods. By providing an approximation to a conventional  
74 generalized additive model (GAM<sup>13</sup>) that allows a data parallelism implementation, GenoGAM  
75 scales linearly with the number of data points and is thus computationally amenable to whole-  
76 genome applications. Our method provides a framework that is applicable not only to ChIP-Seq

77 data, but also to other next-generation sequencing data such as DNA methylation data (Figure 1a).

## 78 RESULTS AND DISCUSSION

### 79 A generalized additive model for ChIP-Seq data

80 We consider an experiment consisting of a set of ChIP-Seq samples. A data point is defined by a  
81 pair of a ChIP-Seq sample and a genomic position. We denote by  $x_i$  the genomic position of the  $i$ -th  
82 data point, by  $j_i$  its ChIP-Seq sample and by  $y_i \geq 0$  the number of fragments in sample  $j_i$  centered  
83 at position  $x_i$ . For single-end libraries, the fragment center is estimated by shifting the read end  
84 position by a constant (Methods). When reducing ChIP-Seq data to fragment centers rather than  
85 full base coverage, each fragment is counted only once. This reduces artificial correlation between  
86 adjacent nucleotides. We model the counts  $y_i$  using the following generalized additive model:

$$y_i \sim \text{NB}(\mu_i, \theta) \quad (1)$$

$$\log(\mu_i) = o_i + \sum_{k=1}^K f_k(x_i) z_{j_i, k} \quad (2)$$

87 The counts  $y_i$  are assumed to follow a negative binomial distribution with means  $\mu_i$  (equation  
88 1) and a dispersion parameter  $\theta$  that relates the variance to the mean such that  $\text{Var}(y_i) = \mu_i + \mu_i^2/\theta$ .  
89 Consequently, the model accounts for overdispersion<sup>10</sup>. The logarithm of the mean  $\mu_i$  is the sum of  
90 an offset  $o_i$  and one or more smooth functions  $f_k$  (equation 2). The offsets  $o_i$  are predefined data-  
91 point specific constants that account for sequencing depth variations (Methods). More elaborate  
92 usage could include position- and sample-specific copy number variations, or GC-biases. The  
93 indicator variable  $z_{j_i, k}$  values 1 if the smooth function  $f_k$  contributes to the mean counts of sample  
94  $j_i$  and 0 otherwise. As demonstrated in the Methods section, this formulation allows modeling IP  
95 versus input experiments as well as factorial experimental designs.

96 We modeled IP versus input experiments using GenoGAM with two smooth functions:  $f_{\text{input}}$   
97 that contributes to both input and IP samples, and  $f_{\text{protein}}$  that only contributes to IP samples. More  
98 specifically,  $f_{\text{input}}$  models local ChIP-Seq biases common to input and IP, whereas  $f_{\text{protein}}$  models  
99 the protein log-occupancy up to one genome-wide scaling factor. Figure 1b shows the application  
100 of this model to one ChIP-Seq library for the *S. cerevisiae* general transcription factor TFIIB and  
101 its input control (Methods).

102 In GenoGAM, the smooth functions are represented by cubic spline curves, which are writ-  
103 ten as linear combinations of a set of regularly spaced B-spline basis functions  $b_r$ , i.e.  $f_k(x) =$   
104  $\sum_r \beta_r b_r(x)$ . We chose second order B-splines as basis functions, which are bell-shaped cubic poly-  
105 nomials over a finite support<sup>14</sup>. To avoid overfitting, additional smoothing of the functions  $f_k$  is  
106 carried out by penalization of the second order differences of the spline coefficients, which ap-  
107 proximately penalizes second order derivatives of  $f_k$  – an approach called P-splines (penalized  
108 B-splines<sup>15</sup>). The optimization criterion for P-splines is the sum of the negative binomial log-  
109 likelihood (depending on the response vector  $y$  and the vector  $\beta$  containing the coefficients of all  
110 smooth functions) plus a penalty function that is weighted by the smoothing parameter  $\lambda$ :

$$\hat{\beta} = \operatorname{argmax}_{\beta} l_{\text{NB}}(\beta; \mathbf{y}, \theta) - \lambda \beta^{\top} \mathbf{S} \beta, \quad (3)$$

111 where  $\mathbf{S}$  is a symmetric positive matrix that encodes the squared second order differences of the  
112 coefficients  $\beta$ <sup>15</sup>. This regularization allows dense placements of the basis functions (between 20  
113 and 50 bp), while relying on the smoothing parameter  $\lambda$  to protect against overfitting. Large values  
114 of  $\lambda$  yield smoother functions. A single smoothing parameter common to all smooth functions  
115 proved to be sufficient for our applications. For given  $\lambda$  and  $\theta$ , model fitting was performed using  
116 penalized iteratively re-weighted least squares (Methods).

117 The penalized likelihood can also be interpreted in a Bayesian fashion<sup>16</sup>, where a multivariate  
118 Gaussian prior is placed on the coefficient vector  $\beta$ . Large-sample approximations then yield a

119 multivariate Gaussian posterior distribution for  $\beta$ , and, by the linearity of  $f_k(x) = \sum_r \beta_r b_r(x)$ ,  
120 Gaussian posteriors for the point estimates  $f_k(x)$ . This allows for the construction of pointwise  
121 confidence bands<sup>16</sup>. An example of the fitted smooth functions and their confidence bands for the  
122 yeast transcription factor TFIIB is shown in Figure 1b.

### 123 **Data-driven determination of the smoothing and dispersion parameters**

124 To determine the optimal value for  $\lambda$  and  $\theta$ , generalized cross-validation, which is based on an  
125 analytical leave-one-out large-sample approximation<sup>16</sup>, yielded very wiggly fits indicative of over-  
126 fitting. We thus developed an empirical cross-validation scheme. To reduce computational time,  
127 cross-validation was performed on a subset of all data. To this purpose, we selected a sufficiently  
128 large set of distinct regions that are long enough to not suffer from border effects common to spline  
129 fitting. Using 40 or more distinct regions containing at least 60 basis functions gave satisfactory  
130 empirical results (Supplementary Table 1). Also, it was important to select regions relevant for the  
131 desired application. For peak calling purposes, regions were selected that had the most significant  
132 fold change of IP versus input read counts (Methods). In each region, 10-fold cross-validation  
133 was performed, where a tenth of the data points were removed, the model was fitted on the re-  
134 maining data points, and the log-likelihood of the left-out data points was computed. Parameter  
135 combinations were scored for the total out-of-sample log-likelihood over all regions. Short range  
136 correlations are strong in ChIP-Seq data and are not fully controlled by replicates or input ex-  
137 periments. To avoid overfitting due to short range correlations, each cross-validation fold did not  
138 consist of randomly selected single base pairs but of short intervals. The length of these intervals  
139 was about a tenth the average fragment size in absence of replicates and twice the average fragment  
140 sizes when replicates were available (Methods). Investigation on grid values of  $\theta$  and  $\lambda$  showed  
141 that the out-of-sample log-likelihood was typically unimodal. We therefore used Nelder-Mead  
142 optimization<sup>17</sup> to jointly fit the two parameters in a computationally faster way than grid search.

## 143 **Fitting a GAM genome-wide**

144 Since the computation time of a GAM grows polynomially with the number of basis functions,  
145 fitting one model to a whole chromosome is unfeasible. Instead, we propose to fit separate GAMs  
146 on sequential overlapping intervals (or tiles, Fig. 2a). As overlap length increases, agreement of  
147 the fit at the midpoint of the overlapping region increases. A genome-wide fit is obtained by joining  
148 together tile fits at overlap midpoints (Fig. 2a). This approximation yields computation times that  
149 are linear in the number of basis functions at no practical precision cost (Fig. 2b). Furthermore,  
150 it allows for parallelization, with speed-ups being linear in the number of cores (Fig. 2c). This  
151 approximation parallelizes the computation over the data, which will allow future implementation  
152 of GenoGAM in map-reduce frameworks such as Spark<sup>18</sup>.

## 153 **GenoGAM provides a competitive peak caller**

154 Because analytical derivatives of P-splines are available, identifying peaks of the protein occu-  
155 pancy  $f_{\text{protein}}$  is straightforward by extracting local maxima where  $f'_{\text{protein}}(x) = 0$  and  $f''_{\text{protein}}(x) < 0$   
156 (Methods, Supplementary Fig. S1). To assess statistical significance of the peak heights, we in-  
157 troduced an empirical z-score that contrasts the estimate of the log-occupancy  $\mu$  at the peak to a  
158 robust estimate of background log-occupancy level  $\mu_0$ , taking both background level variance  $\sigma_0^2$   
159 and uncertainty of peak height  $\sigma^2$  into account (see Methods for their estimation):

$$z = \frac{\mu - \mu_0}{\sqrt{\sigma^2 + \sigma_0^2}}. \quad (4)$$

160 A practical approach to model the null distribution of peak scores is to assume that false  
161 positive peaks arise from symmetric fluctuations of the background and thus distribute similarly to  
162 local minima, or peaks found when inverting the role of input and IP<sup>5</sup>. We therefore estimated the  
163 false discovery rate using the z-score distributions of the local minima (Methods).

164 We first compared the performance of GenoGAM, MACS<sup>5</sup>, JAMM<sup>9</sup> and ZINBA<sup>8</sup> in identi-  
165 fying binding sites of TFIIB. For about 20% of yeast promoters, recruitment of TFIIB is triggered  
166 by the well-characterized DNA element TATA-box, providing at these promoters a ground truth for  
167 a TFIIB occupancy peak<sup>19</sup>. We mapped 1,105 TATA-boxes genome-wide by regular expression of  
168 a consensus motif (Methods) and considered 1 kb regions centered on TATA-boxes for benchmark-  
169 ing. In these regions, significant peaks (FDR < 0.1) from GenoGAM were substantially closer to  
170 TATA-boxes than those of alternative methods (median absolute distance 58 bp, third quartile 144  
171 bp for GenoGAM versus 152 and 247 bp for MACS, 82 and 174 bp for JAMM, and 155 and 237  
172 bp for ZINBA, respectively Fig. 3a).

173 Moreover, the proportion of peaks within 30 bp of a TATA-box center was twice as high as  
174 for any other method independently of the number of reported peaks (Fig. 3b), showing that the  
175 improvement was robust to the score threshold. We performed a similar benchmark (Methods)  
176 on the human chromosome 22 for 6 transcription factors of the ENCODE project<sup>6</sup> selected to  
177 be representative of accuracies in predicting ChIP-Seq peak positions from sequence motifs<sup>20</sup>  
178 (CEBPB, CTCF, MAX, USF1, PAX5, and YY1). On these data, GenoGAM performance was  
179 comparable to the other methods (95% bootstrap confidence intervals, Fig. 3c for significant peaks,  
180 and Supplementary Fig. S2 for distance distributions, Supplementary Fig. S3 for all cutoffs).  
181 Hence, although GenoGAM is a general framework for ChIP-Seq analysis, it nonetheless provides  
182 a peak caller that is at least as performant as dedicated tools.

183 We next investigated the reason for the drastic differences observed in the yeast TFIIB dataset  
184 between GenoGAM and the other methods. The TATA-box region of *IDH2* illustrates the issue  
185 (Fig. 4a). The peaks reported by GenoGAM are positions with maximal a posteriori estimate of IP  
186 over input fold-changes. In contrast, MACS and JAMM report positions with maximal statistical  
187 significance<sup>5,9</sup>. Because statistical significance increases with both effect size and sample size, this  
188 leads to peak calls biased toward positions with high total counts in IP and input (Fig. 4a). Across  
189 all 644 TATA-box regions at which both GenoGAM and MACS identify a peak, total counts within  
190 50 bp of peak positions were higher for MACS, but count ratios were higher for GenoGAM (Fig.



191 4b), generalizing the observations made for *IDH2*. The yeast TFIIB dataset was sequenced at a  
192 much higher coverage than the ENCODE dataset (0.9 unique fragments per base in average versus  
193 less than 0.03 unique fragments per base in average), leading to stronger discrepancies between  
194 significance and robust fold-changes. As sequencing depth is expected to increase in the near  
195 future, we anticipate that robust fold-change estimates as provided by GenoGAM will be a more  
196 sustainable criterion than mere significance for calling peak positions.

### 197 **Higher sensitivity in testing for differential occupancy**

198 To assess the performance of GenoGAM for calling differential occupancy, we re-analyzed histone  
199 H3 Lysine 4 trimethylation (H3K4me3) ChIP-Seq data of a study<sup>21</sup> comparing wild type yeast  
200 versus a mutant with a truncated form of Set1, the H3 Lysine 4 methylase. H3K4me3 is a hallmark  
201 of promoters of actively transcribed genes. Thornton and colleagues<sup>21</sup> have reported genome-wide  
202 redistribution in the truncated Set1 mutant of H3K4me3, which is depleted at the promoter and  
203 enriched in the gene body. We modeled this data with GenoGAM using one smooth function  $f_{WT}$   
204 for the wild type reference occupancy, and one further smooth function  $f_{mutant/WT}$  for the differential  
205 effect. The offsets were computed to control for variations in sequencing depth between replicates  
206 and overall genome-wide H3K4me3 level (Methods). This yielded base-level log-ratio estimates  
207 and their 95% confidence bands genome-wide (Methods, Figure 5a for data and fit at the gene  
208 *YNL176C* consistent with the report of reduced binding at promoter regions).

209 As mentioned above, the confidence bands are Bayesian credible intervals. Previous studies  
210 based on simulated data showed that these confidence bands have close to nominal coverage prob-  
211 abilities and can, in practice, be used in place of frequentist confidence intervals<sup>22</sup>. We estimated  
212 base-level p-values using the point-wise estimates and standard deviations (Methods). To empir-  
213 ically verify that the p-values were at least conservative, we created a negative control dataset by  
214 per-base-pair independent permutation of the counts between the four samples. The offsets were  
215 set to 0 and the smoothing and dispersion parameters were estimated again. This non-parametric  
216 permutation scheme makes less assumptions than previous simulation studies<sup>22</sup>. Nonetheless, per-

217 base-pair p-values in this negative control experiment were slightly overestimated (Figure 5b).  
218 These results show that GenoGAM can be used to identify individual positions of significant dif-  
219 ferential occupancies with controlled type I error. Here, correction for multiple testing can either  
220 be done using the Benjamini and Hochberg procedure<sup>23</sup> or, procedures that exploit dependencies  
221 between adjacent positions<sup>24</sup>.

222 Complementary to de novo identification, predefined regions, such as genes, can be tested for  
223 differential occupancies. To test for differences at any position in a region using GenoGAM, we  
224 propose to apply Hochberg's procedure to correct the pointwise p-values for multiple testing, and to  
225 report the smallest of these corrected p-values (Methods). To validate this approach, we compared  
226 GenoGAM against the following three approaches: csaw<sup>12</sup>, which also tests for differences at  
227 any position in the regions, DESeq<sup>10</sup>, which tests for differences in the overall occupancies, and  
228 MMDiff<sup>11</sup>, which tests for differences of distribution within the regions but not overall occupancy  
229 (Methods). All investigated methods empirically controlled type I error on the permuted dataset  
230 at the 5% nominal level (Supplementary Fig. S4). On the original dataset, the least number of  
231 significant genes (FDR < 0.1) were identified by DESeq (735) and MMDiff (5). The csaw algorithm  
232 gave up to 863 significant genes but the number of identified genes depended strongly on the choice  
233 of the window size (Figure 5c). Of all methods, GenoGAM was the most sensitive, reporting 4,409  
234 significant genes. Up to 861 genes, these genes were a superset of the genes reported by csaw,  
235 indicating that GenoGAM captured the same signal but with a higher sensitivity (Figure 5d). The  
236 genes reported only by GenoGAM showed a differential occupancy pattern similar yet weaker to  
237 the genes common to csaw and GenoGAM, with depletion in the promoter and enrichment in the  
238 gene body (Figure 5d), indicating that GenoGAM captured true biological signal.

### 239 **Application to DNA methylation data**

240 Generalized additive models are based on the generalized linear modeling framework and thus  
241 allow any distribution of the exponential family for the response. Therefore, GenoGAM can be also  
242 used to model continuous responses, for instance using the Gaussian distribution, and proportions

243 using the Binomial distribution. For ChIP-Seq data, a log-linear predictor-response relationship of  
244 the form (2) is justified by the fact that effects on the mean are typically multiplicative. However,  
245 other monotonic link functions could also be used. Moreover, quasi-likelihood approaches are  
246 supported, allowing for the specification of flexible mean-variance relationships<sup>25</sup>.

247 To test the flexibility of GenoGAM, we conducted a proof-of-principle study on modeling  
248 bisulfite sequencing of bulk embryonic mouse stem cells grown in serum<sup>26</sup>. Bisulfite sequencing  
249 quantifies methylation rate by converting cytosine residues to uracil, leaving 5-methylcytosine  
250 residues unaffected. At each cytosine, the data consisted of the number  $n_i$  of fragments overlapping  
251 the cytosine and the number  $y_i$  of these fragments for which the cytosine was not converted to  
252 uracil. The quantity of interest was the methylation rate, i.e. the expectation of the ratio  $y_i/n_i$ .  
253 In the original publication, single nucleotide position methylation rates were estimated using a  
254 sliding window approach with an ad-hoc choice of window size of 3 kb computed in steps of 600  
255 bp. Figure 6 reproduces an original figure showing the fit in a 120kb section of chromosome 6. We  
256 modeled this 120 kb section with GenoGAM using a quasi-binomial model, where the response  
257 was the number of successes  $y_i$  out of  $n_i$  trials, the log-odd ratio was modeled as a smooth function  
258 of the genomic position, and the variance was equal to a dispersion parameter times the variance  
259 of the binomial distribution. Smoothing and dispersion parameters were determined by cross-  
260 validation (Methods). The GenoGAM fit was consistent with the original publication<sup>26</sup>, but did  
261 not rely on manually set window sizes and provided confidence bands (Figure 6). As expected,  
262 wider confidence bands were obtained in regions of sparse data and tighter bands in regions with a  
263 lot of data (Figure 6).

## 264 CONCLUSION

265 We have introduced a generic framework based on generalized additive models to model ChIP-Seq  
266 data. We have made this possible by providing a scalable algorithm that can fit GAMs to very long  
267 longitudinal data such as whole chromosomes at base-pair resolution. Scaling was made possible  
268 by parallelization over the data and allowing approximations rather than exact computation of the

269 fit<sup>27</sup>.

270 Smoothing and dispersion parameters were obtained by cross-validation, i.e. they were fitted  
271 for the accuracy in predicting unseen data. This criterion turned out to provide useful values of  
272 smoothing and dispersion for inference, since we obtain signal peaks close to actual binding sites  
273 of transcription factors when these are known, at least as close as dedicated tools. Moreover, this  
274 criterion also led to reasonable uncertainty estimates since confidence bands of the fits were found  
275 to be only slightly conservative.

276 The utilization of genome-wide GAMs comes with a number of advantages: First, we flexi-  
277 bly model factorial designs, as well as replicates with different sequencing depths using size factors  
278 as offsets. Second, applying GAMs yields confidence bands as a measure of local uncertainty for  
279 the estimated rates. We showed how these can be the basis to compute point-wise and region-wise  
280 p-values. Third, GAMs outputs analytically differentiable smooth functions, allowing flexible  
281 downstream analysis. We showed how peak calling can be elegantly handled by making use of the  
282 first and second derivatives. Fourth, various link functions and distributions can be used, providing  
283 the possibility to model a wide range of genomic data beyond ChIP-Seq, as we illustrated with a  
284 first application on DNA methylation. In conclusion, we foresee GenoGAM as a generic method  
285 for the analysis of genome-wide assays.

## 286 **METHODS**

### 287 **Preprocessing**

288 Fragments were centered, reducing each fragment to one single data point. In case of single end  
289 data, the fragment length  $d$  was estimated using the Bioconductor package `chipseq` and its `cov-`  
290 `erage` method. It is defined as the optimal shift for which the number of bases covered by any read  
291 is minimized. Thus, the center was taken as the start of the read shifted by  $\frac{d}{2}$  downstream.

## 292 Sequencing depth variations

293 Variations for sequencing depth was controlled by using size factors computed by DESeq2<sup>28</sup> (ver-  
294 sion 2.1.10.0 here and after). This method robustly estimates fold-changes in overall sequencing  
295 depth by comparing read counts of predefined regions. The selection criteria for these regions was  
296 application-specific.

297 For peak calling applications, the selected regions were the 1,000 tiles with smallest p-value  
298 according to DESeq2 test for enrichment of IP over input performed on total read counts per  
299 tile. This allowed to select tiles that were most likely containing peaks. For differential binding  
300 application, all tiles were considered.

## 301 Model fitting

### 302 Model fitting given $\lambda$ and $\theta$

303 Each chromosome was partitioned into equally-sized intervals called chunks. Tiles were defined  
304 as chunks extended on either side by equally-sized overhangs. The generalized additive model was  
305 fitted on each tile separately using the *gam* function of the R package *mgcv*. Point estimates at  
306 each base pair of the smooth functions and their standard errors were extracted with the *predict*  
307 function on the fitted object setting “type” parameter to “iterms”. The tile fits were then restricted  
308 to their chunk to define the chromosome-wide fit.

### 309 Fitting of $\lambda$ and $\theta$

310 The parameters  $\lambda$  and  $\theta$  were the same for all tiles and were estimated using 10-fold cross-  
311 validation on a subset of all tiles. The selection of relevant tiles for cross-validation was application-  
312 specific as outlined in the respective sections below. To avoid overfitting due to short range cor-

313 relation, each cross-validation fold did not consist of randomly selected single base pairs but of  
314 short intervals. When replicate samples were available (that is all except for the TFIIB dataset),  
315 intervals could be of greater length as the model can predict samples from the respective replicates.  
316 We set it to twice the estimated fragment length. In the absence of replicates (TFIIB dataset), in-  
317 terval length was set to 20 bp (approximately a tenth of the fragment length.). For a given pair  
318 of values for  $\lambda$  and  $\theta$ , the score function was defined as the sum of out-of-sample log-likelihood  
319 over all cross-validation folds and all tiles, restricted to the data points within chunks to not depend  
320 on poor fitting in overhangs. The parameters  $\lambda$  and  $\theta$  were estimated by gradient-free numerical  
321 optimization of the score function using the Nelder-Mead algorithm (R function *optim*).

## 322 **Yeast TFIIB dataset**

### 323 **ChIP-Seq library preparation, sequencing and read alignment**

324 ChIP-Seq for TFIIB was performed essentially as described previously<sup>29</sup> with a few modifications.  
325 Briefly, 600 ml BY 4741 *S. cerevisiae* culture with C-terminally TAP-tagged TFIIB (Open Biosys-  
326 tems) was used. Immunoprecipitation was performed with 75  $\mu$ l of IgG Sepharose™ 6 Fast Flow  
327 beads (GE Healthcare) for 3 hours at 4°C on a turning wheel. 30  $\mu$ l of Input sample was taken be-  
328 fore immunoprecipitation and stored at 4°C. IP and Input samples were reverse cross-linking for 2  
329 hours with Proteinase K at 65°C and purified using Quiagen MinElute Kit. Samples were digested  
330 with 2.5  $\mu$ l RNase A/T1 Mix (2 mg/ml RNase A, 5000 U/ml RNase T1; Fermentas) at 37°C for  
331 1 h, purified and eluted in 50  $\mu$ l H<sub>2</sub>O. ChIP-Seq libraries were prepared using NEB Next library  
332 preparation kit following manufacturer's instructions using the complete 50  $\mu$ l as input. 2  $\mu$ l of  
333 1.7  $\mu$ M adapters containing a GGAT barcode and 2  $\mu$ l of a 0.25  $\mu$ M adapter containing a CACT  
334 barcode were used for ligation with Input and IP samples, respectively. The final library was am-  
335 plified for 22 cycles using Phusion Polymerase and purified using Agencourt Magnetic beads. 36  
336 bp single end sequencing was performed on an Illumina GAII-X sequencer at the LAFUGA core  
337 facility of the Gene Center, Munich. Single-end 36 base reads and 4 base reads of barcodes were

338 obtained and processed using the Galaxy platform<sup>30</sup>. Reads were demultiplexed, quality-trimmed  
339 (Fastq Quality Filter), and mapped with Bowtie 0.12.7<sup>31</sup> to the SacCer2 genome assembly (Bowtie  
340 options: -q -p 4 -S -sam-nohead -phred33-quals).

### 341 **GenoGAM model**

This dataset consisted of two samples: one input and one IP without replicates. Hence there was no need for an offset. We used the following GenoGAM model:

$$y_i \sim \text{NB}(\mu_i, \theta)$$
$$\log(\mu_i) = f_{\text{input}}(x_i) + f_{\text{protein}}(x_i)z_{j_i, \text{protein}},$$

342 where  $z_{j_i, \text{protein}} = 1$  whenever  $j_i$  is the index of an IP sample and  $z_{j_i, \text{protein}} = 0$  whenever  $j_i$  is the  
343 index of an input sample. Further parameter details are given in Supplementary Table S1.

### 344 **TATA box mapping**

345 Promoter TATA boxes were defined as instances of the motif TATAWAWR<sup>19</sup> at most 200 bp 5'  
346 and 50 bp 3' of one of the 7,272 transcript 5'-ends reported by Xu et al.<sup>32</sup>.

### 347 **ENCODE transcription factors**

#### 348 **Data processing**

349 Alignment files (BAM files, aligned for the human genome assembly hg19) for ChIP-Seq data  
350 for the transcription factors CEBPB, CTCF, MAX, USF1, PAX5, and YY1 were obtained from  
351 the ENCODE website [www.encodeproject.org](http://www.encodeproject.org). All these datasets contained two biological  
352 replicates for the protein samples and at least one input sample. However, the library sizes of the

353 input samples were so small that including them resulted in higher uncertainty about the peaks,  
354 for our approach and for alternative approaches. We therefore conducted the analyses without  
355 correction for input.

### 356 **GenoGAM model**

357 For each transcription factor the dataset was modeled separately. Each one consisted of IPs with  
358 replicates. The following GenoGAM model was used:

$$y_i \sim \text{NB}(\mu_i, \theta)$$
$$\log(\mu_i) = \log(s_{j_i}) + f_{\text{protein}}(x_i),$$

359 where the offsets  $\log(s_{j_i})$  are log-size factors computed to control for sequencing depth vari-  
360 ation between the replicates (see section ). Further parameter details are given in Supplementary  
361 Table S1.

### 362 **Transcription factor motif mapping**

363 Motif occurrences in the genome were determined by FIMO<sup>33</sup> using default threshold  $10^{-4}$  with  
364 position weight matrices (PWMs) from the JASPAR 2014 database<sup>34</sup> with the following IDs:  
365 CEBPB: MA0466.1, CTCF: MA0139.1, MAX: MA0058.1, PAX5: MA0014.2, USF1: MA0093.2,  
366 YY1: MA0095.2



## 367 **Peak calling**

### 368 **GenoGAM-based peak calling and z-score**

369 Values of first and second derivatives of fitted smooth functions were obtained by multiplying the  
370 estimated coefficients with the corresponding derivatives of the B-splines as obtained from the  
371 *spline.des* function of the R package `splineDesign`. Local extrema (at base pair resolution)  
372 were identified as positions at which the sign of the first derivative differed from the one of the  
373 preceding position. For the z-score (equation 4),  $\mu_0$  is the global background mean and  $\sigma_0^2$  is the  
374 global background variance of  $f(x)$ . In order to account only for the background without potential  
375 peaks,  $\mu_0$  was estimated as the *shorth* from the Bioconductor `genefilter` package for all  $f(x_i)$ ,  
376  $i = 1, \dots, n$  (midpoint of the shortest interval containing half of the data) of all fitted values.  
377 The fitted values smaller than the shorth were mirrored on it, such that a symmetric density was  
378 created that excludes the values larger than the shorth, in particular those high values representing  
379 peaks. The variance of this newly created distribution was then estimated in a robust fashion by  
380 the *median absolute deviation* (MAD) giving  $\sigma_0^2$  (Supplementary Figure S1).

### 381 **False Discovery Rate for GenoGAM peaks**

382 To estimate false discovery rates (FDR), peaks were called on  $-f_{\text{protein}}$ . Their z-scores were ob-  
383 tained by recomputing  $\mu_0$  and  $\sigma_0$  and applying the same formula. The FDR for a given minimum  
384 z-score  $z$  was estimated by  $\frac{|V_z|}{|P_z|+|V_z|}$ , where  $P_z$  and  $V_z$  are the sets of peaks and valleys, respectively,  
385 with a z-score greater than or equal to  $z$ .

## 386 **MACS, JAMM, and ZINBA**

387 The version 2 of the MACS software, MACS2, was run with the default parameters and the addi-  
388 tional flag *call-summits*. In case of TFIIB, the *nomodel* parameter was used to avoid building the  
389 shifting model. This was necessary since the default values for *mfold* were too high and resulted  
390 in worse performance if reduced, compared to absence of a model.

391 JAMM was run with default values and peak calling mode (*-m*) set to narrow assuming a  
392 three component mixture model for background, enriched regions and tails of enriched regions.  
393 Although JAMM computes a score to rank peaks it does not provide a method to define a threshold  
394 for a given FDR or significance. Nevertheless, JAMM applies some filtering on the complete list  
395 of peaks to output a filtered list. Instead of using this filtered output directly, we used the complete,  
396 sorted (by score) peak list and took the top *N* results where *N* is the number of peaks in the filtered  
397 output. This improved the performance of JAMM in some cases (and left unchanged in others).  
398 For analysis, where a cutoff for JAMM was still needed we used the same number of peaks that  
399 MACS reported.

400 For ZINBA, the mappability score was generated (*generateAlignability*) with the mappabil-  
401 ity files for 36 bp reads, taken from the ZINBA website [https://code.google.com/p/](https://code.google.com/p/zinba/)  
402 *zinba/*. The average fragment length (*extension*) was specified at 190 bp, window size (*win-*  
403 *Size*) at 250 and offset (*offset*) at 125. The FDR threshold was set to 0.1 and window gap to 0.  
404 Peaks were refined (default) and model selection was activated. The complete model was used  
405 (*selecttype = "complete"*), input was included as a covariate (*selectcovs = "input\_count"*) and  
406 interactions were allowed. The chromosome used to build the model was selected randomly to be  
407 "chrXVI" (*selectchr*). The parameter "method" was set *method = "mixture"*.

## 408 Differential binding

## 409 Data processing

410 Raw sequencing files (H3K4ME3\_Full\_length\_Set1\_Rep\_1.fastq,  
411 H3K4ME3\_Full\_length\_Set1\_Rep\_2.fastq, H3K4ME3\_aa762-1080\_Set1\_Rep\_1.fastq,  
412 and H3K4ME3\_aa762-1080\_Set1\_Rep\_2.fastq) were obtained from the Sequence Read Archive  
413 (SRA) repository (<http://www.ncbi.nlm.nih.gov/sra>). These were paired-end reads.  
414 Reads were aligned to the SacCer3 build of the *S. cerevisiae* genome with the STAR aligner<sup>35</sup> (ver-  
415 sion 2.4.0, default parameters). Reads with ambiguous mapping were removed using samtools<sup>36</sup>  
416 (version 1.2 option `-q 255`). Gene boundaries were obtained from the *S. cerevisiae* genome anno-  
417 tation R64.1.1, restricting gff file entries of type "gene".

## 418 GenoGAM model

419 This dataset consisted of four samples: two biological replicate IPs for the wild type strain, and  
420 two biological replicate IPs for the mutant strain. We used the following GenoGAM model:

$$y_i \sim \text{NB}(\mu_i, \theta)$$
$$\log(\mu_i) = \log(s_{j_i}) + f_{\text{WT}}(x_i) + f_{\text{mutant/WT}}(x_i)z_{j_i,\text{mutant}}$$

421 where  $z_{j_i,\text{mutant}} = 1$  for  $j$  index of one mutant sample and 0 for wild-type samples. The off-  
422 sets  $\log(s_{j_i})$  are log-size factors computed to control for sequencing depth variation and overall  
423 H3K4me3 across all four samples (see section ). Further parameter details are given in Supple-  
424 mentary Table S1.

## 425 **Position-level significance testing**

426 Null hypotheses of the form  $H_0 : f_k(x) = 0$  for a smooth function  $f_k()$  at a given position  $x$  of  
427 interest were tested assuming approximate normal distribution of the corresponding z-score, i.e.:

$$T_k(x) \sim N(0, 1)$$

where

$$T_k(x) = \frac{\hat{f}_k(x)}{\hat{\sigma}_{f_k(x)}^2}$$

428 where  $\hat{f}_k(x)$  and  $\hat{\sigma}_{f_k(x)}^2$  denote point estimate and standard error of the smoothed value <sup>16</sup> as  
429 returned by the function `predict(..., type="iterms", se.fit=TRUE)` of the R package `mgcv`.

## 430 **False discovery rate for predefined regions**

431 Let  $R_1, \dots, R_p$  be  $p$  regions of interest, where a region is defined as a set of genomic positions.  
432 Regions are typically but not necessarily, intervals (e.g. genes or promoters). For instance, all  
433 exons of a gene could make up a single region. Regions can be a priori defined or defined on the  
434 data using independent filtering <sup>37</sup>. For instance, when testing for significant differences between  
435 two conditions, regions can be selected for having a large total number of reads over the two  
436 conditions <sup>12</sup>.

For  $j$  in  $1, \dots, p$ , let  $H_0^j$  be the composite null hypothesis that the smooth function  $f_k$  values 0  
at every position of the region  $R_j$ :

$$H_0^j = \bigwedge_{x_i \in R_j} (f_k(x_i) = 0)$$

437 The False Discovery Rate was controlled using the following procedure <sup>12</sup>:

- 438 1. Position-level p-values at all region positions were computed using position-level significant  
439 testing as described above.
- 440 2. Within each region  $R_j$ , position-level p-values were corrected for multiple testing using  
441 Hochberg family-wise error rate correction <sup>38</sup>. The Hochberg correction was applied because  
442 position-level p-values of one smooth function are positively associated. The p-value for  
443 the null hypothesis  $H_0^j$  was then computed as the minimal family-wise error rate corrected  
444 position-level p-value. This step gives one p-value per region.
- 445 3. FDRs were computed using Benjamini-Hochberg procedure <sup>23</sup> applied to the region-level  
446 p-values.

## 447 **Benchmarking**

448 The R/Bioconductor packages `DESeq2`<sup>28</sup>, `MMDiff`<sup>11</sup>, and `csaw`<sup>12</sup> were applied on original count  
449 data and on the base-level permuted dataset, for all genes. The log-size factors were set 0 for all  
450 methods when applied to the permuted datasets. `DESeq2` was applied with default parameters.  
451 `MMDiff` was applied with a bin length of 50 bp, the `DESeq` method for the normalization factor,  
452 and the Maximum Mean Discrepancy (MMD) histogram distance. The `csaw` method was applied  
453 with window size of 150 bp and otherwise default parameters. The window size was determined  
454 through a grid search (see Figure 5c), choosing the window size with the most significant genes.  
455 In particular, `csaw` uses a different procedure to estimate normalization factors than `DESeq` and  
456 `MMDiff`. We used the default one as it was in favor of `csaw` for returning more significant genes.

## 457 Methylation data

## 458 Data processing

459 We obtained the data in text table format from Smallwood et al.<sup>26</sup> from the Gene Expression Om-  
460 nibus (GEO) repository <http://www.ncbi.nlm.nih.gov/gds>. The data provided, was  
461 one record per CpG site, with the number of methylated and unmethylated fragments at the re-  
462 spective site. We used a Python script to bin this data into bins of 3,000 bp width every 600 bp, as  
463 was done in the original paper.

## 464 GenoGAM model

To model  $y_i$ , the number of reads of methylated state, out of  $n_i$ , the total number of reads, we used the quasi-binomial model defined by:

$$\begin{aligned} E(y_i/n_i) &= \mu_i \\ \log\left(\frac{\mu_i}{1 - \mu_i}\right) &= f_{\text{methylation}}(x_i) \\ \text{Var}(y_i/n_i) &= \theta \cdot \frac{\mu_i(1 - \mu_i)}{n_i}, \end{aligned}$$

465 where the scale parameter  $\theta > 0$  models dispersion. The model was applied on only one tile with a  
466 width of 120 kb, reproducing Figure 2a of Smallwood et al.<sup>26</sup>. Further parameter details are given  
467 in Supplementary Table S1.

## 468 Accession code

469 ChIP-Seq data are available at Array Express under the accession number E-MTAB-4175. For  
470 review, user: Reviewer\_E-MTAB-4175, password: NF3Qvgio

471 **Code availability**

472 Scripts used for this study are provided in Additional data file 2. A R package called GenoGAM  
473 has been submitted to Bioconductor<sup>39</sup>. Refer to the Bioconductor web page at [http://www.](http://www.bioconductor.org)  
474 [bioconductor.org](http://www.bioconductor.org) for installation procedures.

475 **COMPETING INTERESTS**

476 The authors declare that they have no competing interests.

477 **AUTHOR'S CONTRIBUTIONS**

478 Conceived the project and supervised the work: JG AT. Developed the software and carried out the  
479 analysis: GS AE JG Carried out the ChIP-Seq experiments for TFIIB on yeast: DS. Gave advice  
480 on statistics: MS. Wrote the manuscript: JG AE GS MS AT

481 **ACKNOWLEDGEMENTS**

482 We thank Ulrich Unnerstall and Michael Lidschreiber for fruitful discussions on data analysis,  
483 Martin Morgan and Hervé Pagès for support during the implementation of the GenoGAM pack-  
484 age, Stefan Krebs for sequencing and raw data preprocessing, and Ulrich Mansmann and Patrick  
485 Cramer for institutional support. JG was supported by the Bavarian Research Center for Molecular  
486 Biosystems and by the Bundesministerium für Bildung und Forschung through the Juniorverbund  
487 in der Systemmedizin 'mitOmics' (FKZ 01ZX1405A). We acknowledge support from the Euro-  
488 pean Commission through the Horizon 2020 project SOUND (GS, JG) and from the Graduate  
489 School for Quantitative Biosciences Munich (AE).

## 490 REFERENCES

- 492 1. Robertson, G. *et al.* Genome-wide profiles of STAT1 DNA association using chromatin im-  
491 munoprecipitation and massively parallel sequencing. *Nature methods* **4**, 651–657 (2007).  
493
- 494 2. Johnson, D. S., Mortazavi, A., Myers, R. M. & Wold, B. Genome-wide mapping of in vivo  
495 protein-DNA interactions. *Science (New York, N.Y.)* **316**, 1497–502 (2007). URL <http://www.sciencemag.org/content/316/5830/1497.long>.  
496
- 497 3. Barski, A. *et al.* High-resolution profiling of histone methylations in the human genome.  
498 *Cell* **129**, 823–37 (2007). URL [http://www.sciencedirect.com/science/](http://www.sciencedirect.com/science/article/pii/S0092867407006009)  
499 [article/pii/S0092867407006009](http://www.sciencedirect.com/science/article/pii/S0092867407006009).
- 500 4. Albert, I. *et al.* Translational and rotational settings of H2A.Z nucleosomes across the *Saccha-*  
501 *romyces cerevisiae* genome. *Nature* **446**, 572–6 (2007). URL [http://dx.doi.org/10.](http://dx.doi.org/10.1038/nature05632)  
502 [1038/nature05632](http://dx.doi.org/10.1038/nature05632).
- 503 5. Zhang, Y. *et al.* Model-based analysis of ChIP-Seq (MACS). *Genome Biology* **9**, R137 (2008).
- 504 6. Consortium, E. P. *et al.* An integrated encyclopedia of DNA elements in the human genome.  
505 *Nature* **489**, 57–74 (2012).
- 506 7. Yan, H. *et al.* HiChIP: a high-throughput pipeline for integrative analysis of ChIP-Seq data.  
507 *BMC bioinformatics* **15**, 280 (2014).
- 508 8. Rashid, N. U., Giresi, P. G., Ibrahim, J. G., Sun, W. & Lieb, J. D. ZINBA integrates local  
509 covariates with DNA-seq data to identify broad and narrow regions of enrichment, even within  
510 amplified genomic regions. *Genome Biology* **12**, R67 (2011).
- 511 9. Ibrahim, M. M., Lacadie, S. A. & Ohler, U. JAMM: a peak finder for joint analysis of NGS  
512 replicates. *Bioinformatics (Oxford, England)* **31**, 48–55 (2015).
- 513 10. Anders, S. & Huber, W. Differential expression analysis for sequence count data. *Genome*  
514 *Biology* **11**, R106–R106 (2010). URL [http://genomebiology.com/2010/11/10/](http://genomebiology.com/2010/11/10/R106papers2://publication/doi/10.1186/gb-2010-11-10-r106)  
515 [R106papers2://publication/doi/10.1186/gb-2010-11-10-r106](http://genomebiology.com/2010/11/10/R106papers2://publication/doi/10.1186/gb-2010-11-10-r106).



- 516 11. Schweikert, G., Cseke, B., Clouaire, T., Bird, A. & Sanguinetti, G. MMDiff: quantitative  
517 testing for shape changes in ChIP-Seq data sets. *BMC genomics* **14**, 826 (2013).
- 518 12. Lun, A. T. & Smyth, G. K. De novo detection of differentially bound regions for ChIP-seq  
519 data using peaks and windows: controlling error rates correctly. *Nucleic acids research* **42**,  
520 e95–e95 (2014).
- 521 13. Hastie, T., Tibshirani, R. *et al.* Generalized additive models. *Statistical science* **1**, 297–310  
522 (1986).
- 523 14. De Boor, C. *A practical guide to splines*, vol. 27 (Springer-Verlag New York, 1978).
- 524 15. Eilers, P. H. & Marx, B. D. Flexible smoothing with B-splines and penalties. *Statistical*  
525 *science* 89–102 (1996).
- 526 16. Wood, S. *Generalized additive models: an introduction with R* (CRC press, 2006).
- 527 17. Nelder, J. A. & Mead, R. A simplex method for function minimization. *The computer journal*  
528 **7**, 308–313 (1965).
- 529 18. Zaharia, M., Chowdhury, M., Franklin, M. J., Shenker, S. & Stoica, I. Spark: cluster comput-  
530 ing with working sets. In *Proceedings of the 2nd USENIX conference on Hot topics in cloud*  
531 *computing*, vol. 10, 10 (2010).
- 532 19. Basehoar, A. D., Zanton, S. J. & Pugh, B. F. Identification and distinct regulation of yeast  
533 TATA box-containing genes. *Cell* **116**, 699–709 (2004).
- 534 20. Alipanahi, B., DeLong, A., Weirauch, M. T. & Frey, B. J. Predicting the sequence specificities  
535 of DNA-and RNA-binding proteins by deep learning. *Nature biotechnology* (2015).
- 536 21. Thornton, J. *et al.* Context dependency of Set1/ COMPASS-mediated histone H3 Lys4  
537 trimethylation. *Genes & Development* **28**, 115–120 (2014).
- 538 22. Marra, G. & Wood, S. N. Coverage properties of confidence intervals for generalized additive  
539 model components. *Scandinavian Journal of Statistics* **39**, 53–74 (2012).

- 540 23. Benjamini, Y. & Hochberg, Y. Controlling the false discovery rate: a practical and powerful  
541 approach to multiple testing. *Journal of the Royal Statistical Society. Series B (Methodologi-*  
542 *cal)* 289–300 (1995).
- 543 24. Wei, Z., Sun, W., Wang, K. & Hakonarson, H. Multiple testing in genome-wide associa-  
544 tion studies via hidden Markov models. *Bioinformatics (Oxford, England)* **25**, 2802–2808  
545 (2009). URL [http://bioinformatics.oxfordjournals.org/cgi/doi/10.](http://bioinformatics.oxfordjournals.org/cgi/doi/10.1093/bioinformatics/btp476)  
546 [1093/bioinformatics/btp476](http://bioinformatics.oxfordjournals.org/cgi/doi/10.1093/bioinformatics/btp476).
- 547 25. Wedderburn, R. W. Quasi-likelihood functions, generalized linear models, and the  
548 Gauss—Newton method. *Biometrika* **61**, 439–447 (1974).
- 549 26. Smallwood, S. A. *et al.* Single-cell genome-wide bisulfite sequencing for assessing epigenetic  
550 heterogeneity. *Nature methods* **11**, 817–820 (2014).
- 551 27. Heinis, T. Data analysis: approximation aids handling of big data. *Nature* **515**, 198 (2014).  
552 URL <http://dx.doi.org/10.1038/515198d>.
- 553 28. Love, M. I., Huber, W. & Anders, S. Moderated estimation of fold change and dispersion for  
554 RNA-seq data with DESeq2. *Genome Biology* **15**, 550 (2014).
- 555 29. Schulz, D. *et al.* Transcriptome Surveillance by Selective Termination of Noncoding RNA  
556 Synthesis. *Cell* **155**, 1075–1087 (2013).
- 557 30. Goecks, J., Nekrutenko, A. & Taylor, J. Galaxy: a comprehensive approach for supporting  
558 accessible, reproducible, and transparent computational research in the life sciences. *Genome*  
559 *Biology* **11**, R86 (2010). URL <http://genomebiology.com/2010/11/8/R86>.
- 560 31. Langmead, B., Trapnell, C., Pop, M. & Salzberg, S. L. Ultrafast and memory-efficient align-  
561 ment of short DNA sequences to the human genome. *Genome Biology* **10**, R25 (2009). URL  
562 <http://genomebiology.com/2009/10/3/R25>.
- 563 32. Xu, Z. *et al.* Bidirectional promoters generate pervasive transcription in yeast.  
564 *Nature* (2009). URL <http://www.nature.com/nature/journal/vaop/>

565 [ncurrent/full/nature07728.htmlpapers2://publication/doi/doi:](http://ncurrent/full/nature07728.htmlpapers2://publication/doi/doi:10.1038/nature07728)  
566 [10.1038/nature07728.](http://ncurrent/full/nature07728.htmlpapers2://publication/doi/doi:10.1038/nature07728)

567 33. Grant, C. E., Bailey, T. L. & Noble, W. S. FIMO: scanning for occurrences of a given motif.  
568 *Bioinformatics (Oxford, England)* **27**, 1017–8 (2011). URL [http://bioinformatics.](http://bioinformatics.oxfordjournals.org/content/27/7/1017)  
569 [oxfordjournals.org/content/27/7/1017.](http://bioinformatics.oxfordjournals.org/content/27/7/1017)

570 34. Mathelier, A. *et al.* JASPAR 2014: an extensively expanded and updated open-access  
571 database of transcription factor binding profiles. *Nucleic acids research* **42**, D142–7  
572 (2014). URL [http://nar.oxfordjournals.org/content/early/2013/11/](http://nar.oxfordjournals.org/content/early/2013/11/04/nar.gkt997.full)  
573 [04/nar.gkt997.full.](http://nar.oxfordjournals.org/content/early/2013/11/04/nar.gkt997.full)

574 35. Dobin, A. *et al.* STAR: ultrafast universal RNA-seq aligner. *Bioinformatics (Oxford, Eng-*  
575 *land)* **29**, 15–21 (2013). URL [http://bioinformatics.oxfordjournals.org/](http://bioinformatics.oxfordjournals.org/content/29/1/15.long)  
576 [content/29/1/15.long.](http://bioinformatics.oxfordjournals.org/content/29/1/15.long)

577 36. Li, H. *et al.* The Sequence Alignment/Map format and SAMtools. *Bioinformatics (Oxford,*  
578 *England)* **25**, 2078–9 (2009). URL [http://bioinformatics.oxfordjournals.](http://bioinformatics.oxfordjournals.org/content/25/16/2078.long)  
579 [org/content/25/16/2078.long.](http://bioinformatics.oxfordjournals.org/content/25/16/2078.long)

580 37. Bourgon, R., Gentleman, R. & Huber, W. Independent filtering increases detection power for  
581 high-throughput experiments. *Proceedings of the National Academy of Sciences* **107**, 9546–  
582 9551 (2010).

583 38. Hochberg, Y. A sharper Bonferroni procedure for multiple tests of significance. *Biometrika*  
584 **75**, 800–802 (1988).

585 39. Gentleman, R. C. *et al.* Bioconductor: open software development for computational biology  
586 and bioinformatics. *Genome biology* **5**, R80 (2004). URL [http://genomebiology.](http://genomebiology.biomedcentral.com/articles/10.1186/gb-2004-5-10-r80)  
587 [biomedcentral.com/articles/10.1186/gb-2004-5-10-r80.](http://genomebiology.biomedcentral.com/articles/10.1186/gb-2004-5-10-r80)

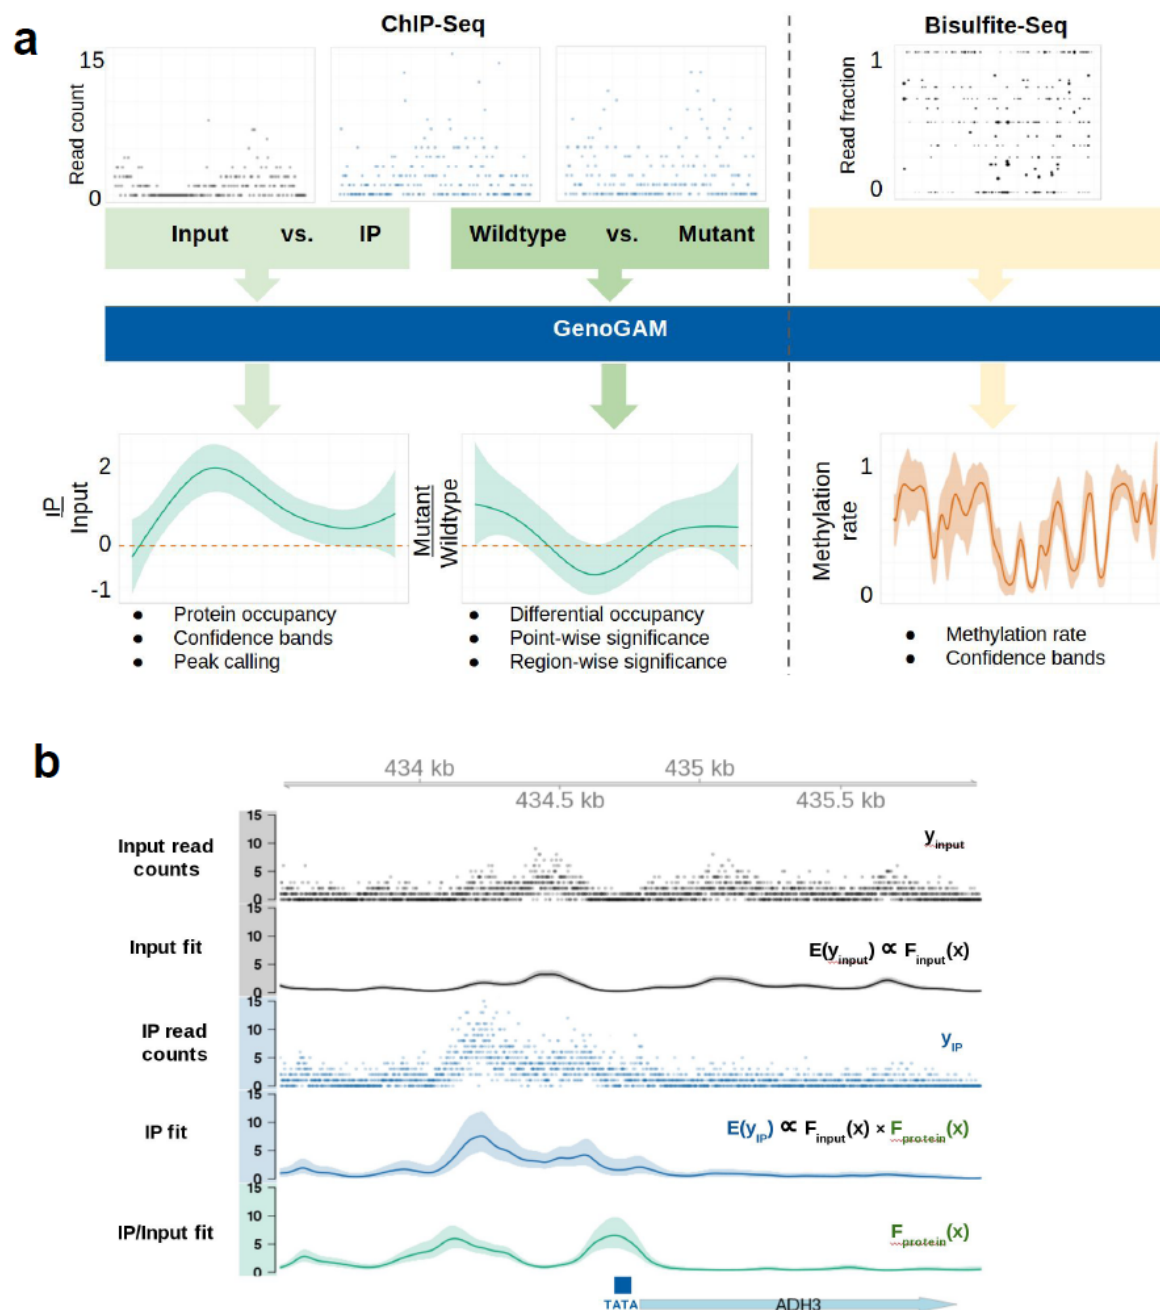

Figure 1: **GenoGAM applications and concept** (a) GenoGAM provides a general framework to analyze ChIP-Seq data for both absolute (left arrow) and differential protein (center arrow) occupancy. It can also be applied to infer DNA methylation rate from bisulfite sequencing data (right arrow). (b) ChIP-Seq analysis with GenoGAM yields base-pair resolution occupancy profiles with confidence bands. Input (black) and IP (blue) centered read counts (dots) and fitted smooth (solid line) with 95% confidence intervals (ribbons) for the transcription factor TFIIB for a section of the chromosome XIII of *S. cerevisiae*. Additionally, the extracted fold change of IP over Input (green) and gene annotation at the very bottom. Simplified equations depict model constituents.

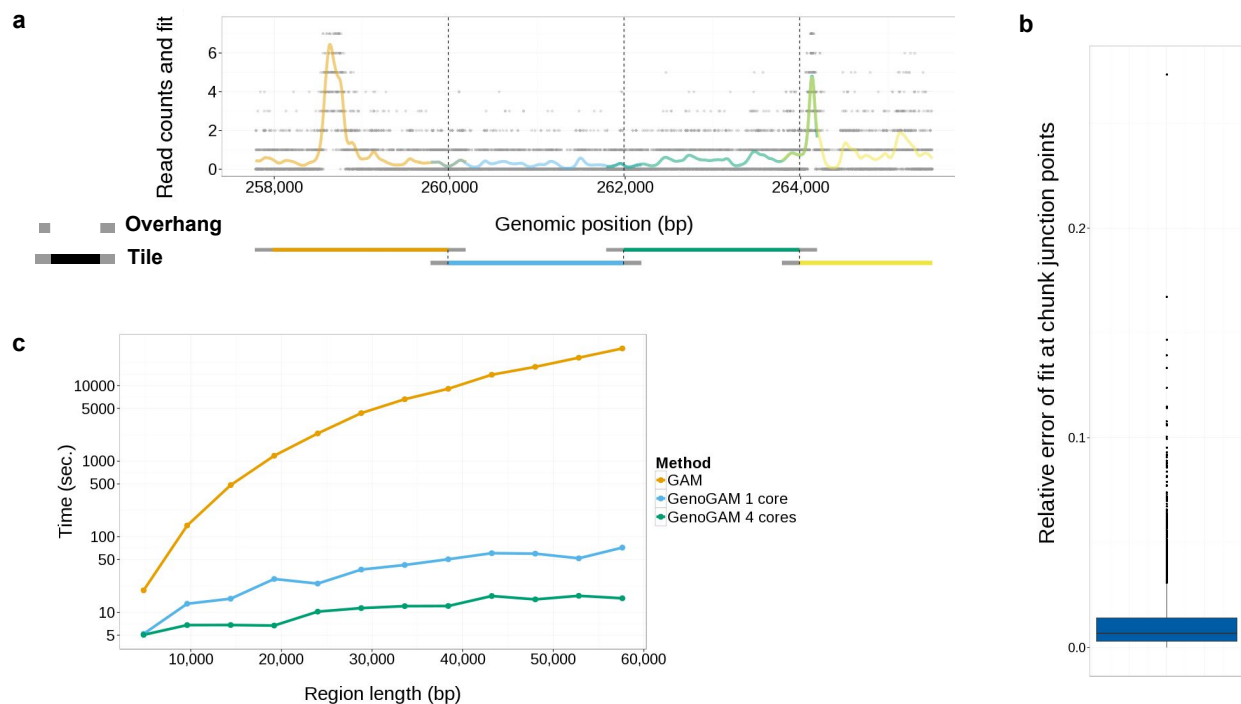

Figure 2: **Per tile-parallelization allows map-reduce implementation of GAM.** (a) Read count (black dots, capped at  $\geq 7$ ) and predicted rates (orange, blue, green, and yellow transparent lines) for four successive tiles (lower track). Vertical dashed lines denote the junction points (b) Distribution of the relative error (difference over mean) at the junction point of two neighbor tiles, for an overhang of 8 basis functions. (c) Computing time in seconds (y-axis in log scale) versus region length in bp (x-axis) for a standard GAM (orange), GenoGAM on a single core (blue), and GenoGAM on four cores (green). Tiles were 2,400 bp long and contained 100 basis functions each.

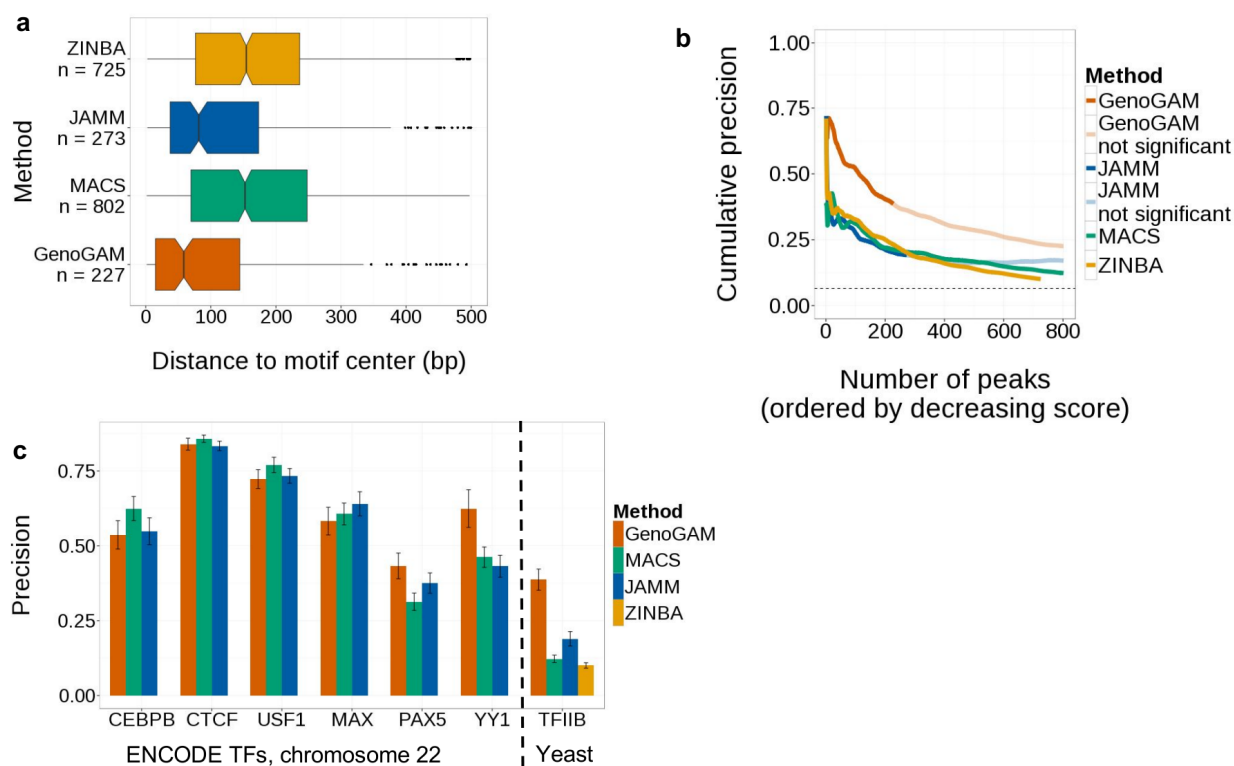

**Figure 3: GenoGAM identifies protein binding sites with similar accuracy to state-of-the-art peak callers.** (a) Boxplot of distances between significant peaks ( $FDR < 0.1$ , Methods) and TATA box for the yeast TFIIB dataset (Methods) for GenoGAM (orange), MACS (green) and JAMM (blue) and ZINBA (yellow). (b) Proportion of TFIIB peaks (y-axis) within 30 bp of a TATA box for GenoGAM (orange), MACS (green), JAMM (blue) and ZINBA (yellow) versus number of selected peaks when ordered by decreasing score (x-axis). For each method transparent colors indicate peaks that the method considers not significant ( $FDR > 0.1$ , Methods). (c) Proportion of significant peaks within 30 bp of motif center and 95% bootstrap confidence interval (error bars, Methods) for all six ENCODE transcription factors (CEBPB, CTCF, USF1, MAX, PAX5, YY1) on chromosome 22 and for the yeast TFIIB dataset.

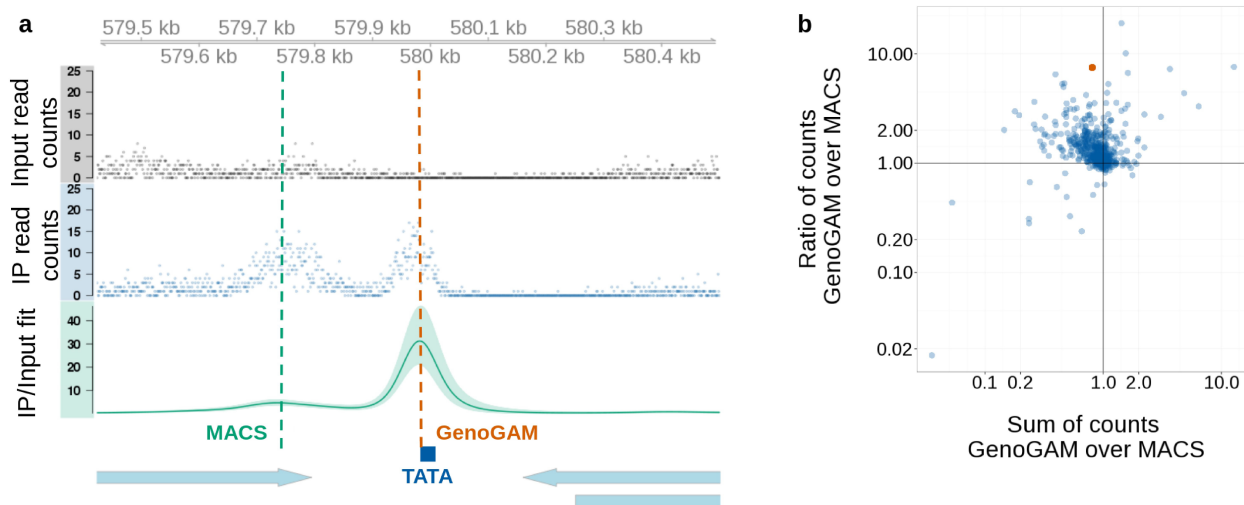

Figure 4: **Peak position represent maximal fold change rather than maximal significance.** (a) Example region in yeast with input (black dots), IP (blue dots) and the smooth function IP over input with 95% confidence interval (green line) showing a correctly identified peak by GenoGAM (orange vertical dashed line) and an incorrect identified by MACS (green vertical dashed line), due to enrichment in input. (b) Scatterplot of the sum of counts (input + IP) vs ratio of counts (input/IP) for GenoGAM divided by MACS on all mutually called TATA box positions. The red dot denotes the example region shown in (a)

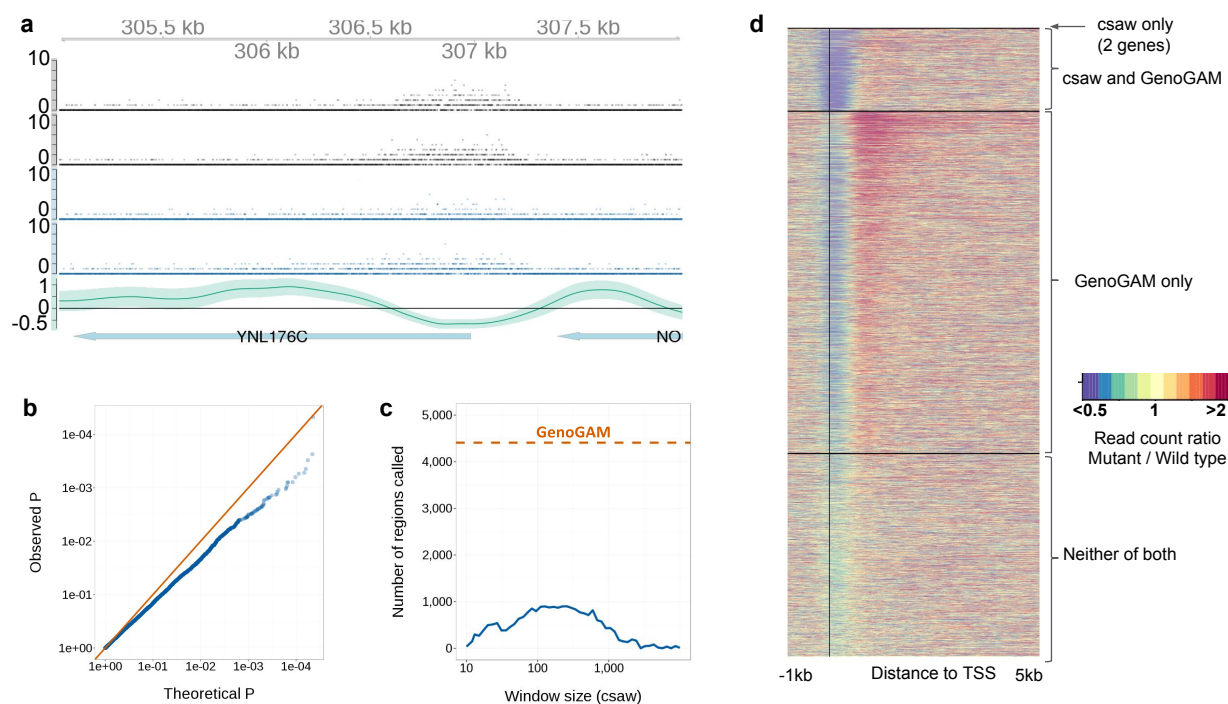

**Figure 5: Statistical testing for factorial designs.** (a) Read counts (dots) and fitted rates with 95% confidence bands for wild-type (black) and mutant (blue) and the log-ratio of mutant over wild-type with confidence band (bottom row, green) around *YNL176C*. (b) Empirical (y-axis) versus theoretical (x-axis) p-values in base-level permuted count data (Methods). P-values at every 200 bp positions are shown. (c) Number of genes with significant differential occupancies in mutant over wild type (FDR < 0.1) reported by GenoGAM (orange) and by csaw (blue) as function of window size (x-axis). (d) Fold-change of counts in mutant over wild-type in 150 bp windows for all 6607 yeast genes in the -1 to 5 kb region centered on TSS (vertical black line). The genes are sorted into four groups (separated by the black horizontal lines) according to which method reports them significant. From top to bottom: csaw only (2 genes), csaw and GenoGAM (861 genes), GenoGAM only (3,548 genes) and none (2,196 genes). Within each group genes are ordered by p-values (lowest to highest from top to bottom). The “csaw and GenoGAM” group is sorted by GenoGAM p-values.



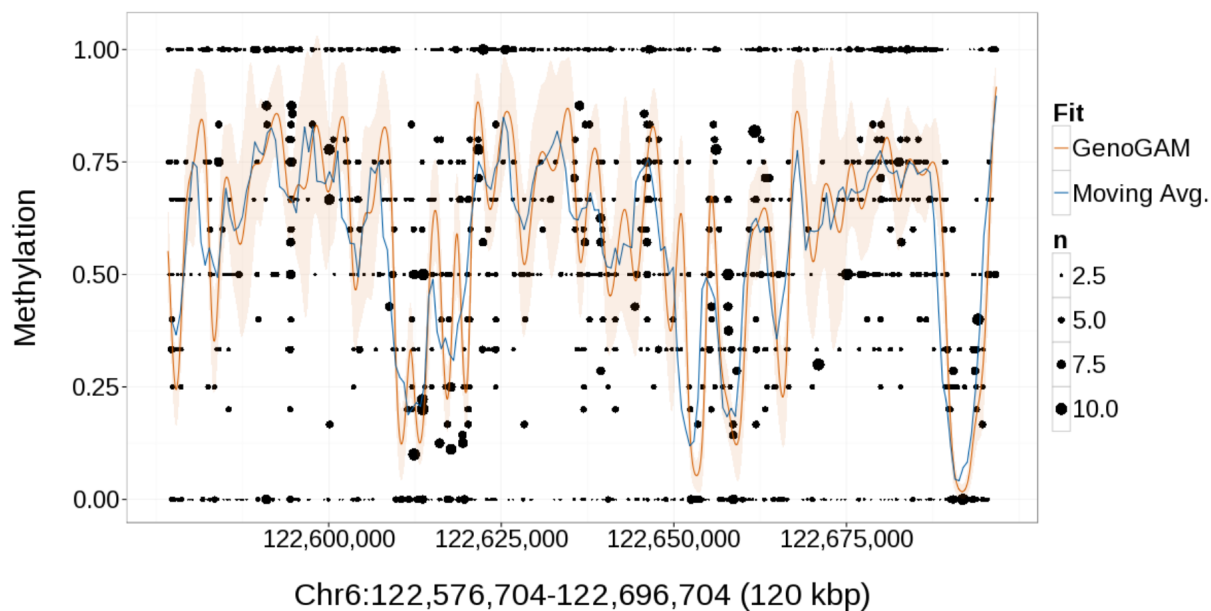

Figure 6: **Application to DNA methylation data.** Estimated DNA methylation rates in a 120 kb region of chromosome 6 of the mouse (cf. Smallwood et al.<sup>26</sup>). Shown are the data for bulk embryonic mouse stem cells grown in serum; ratios of methylated counts for each CpG position (black dots), with point size proportional to the number of reads. The estimated rates are shown for the moving average approach<sup>26</sup> of 3,000 bp bins in 600 bp steps (blue line) and for the GenoGAM (orange line) with 95% confidence band (ribbon).
